# Supplementary material
Source: Springer Nature journal article supplement (https://www.springermedizin.de/resource/supplementary/13550_2012_64_MOESM1_ESM.pdf/9687518)

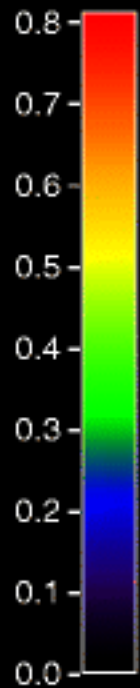

CBF

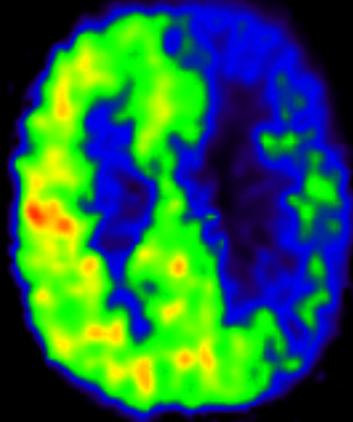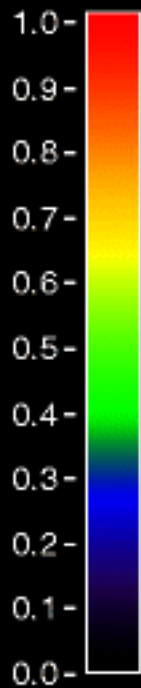

OEF

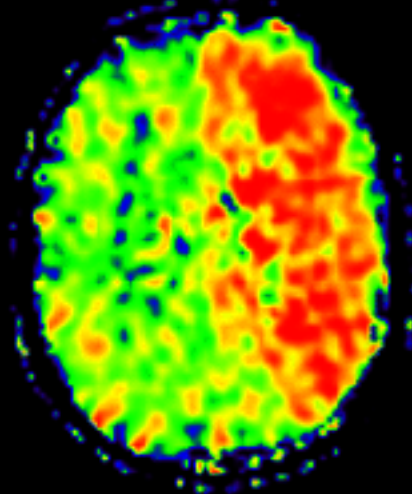

Supplement: MOESM1 [file 9687518]
